# Supplementary material
Source: Springer Nature journal article supplement (https://www.springermedizin.de/resource/supplementary/12902_2008_80_MOESM3_ESM.pdf/9516196)

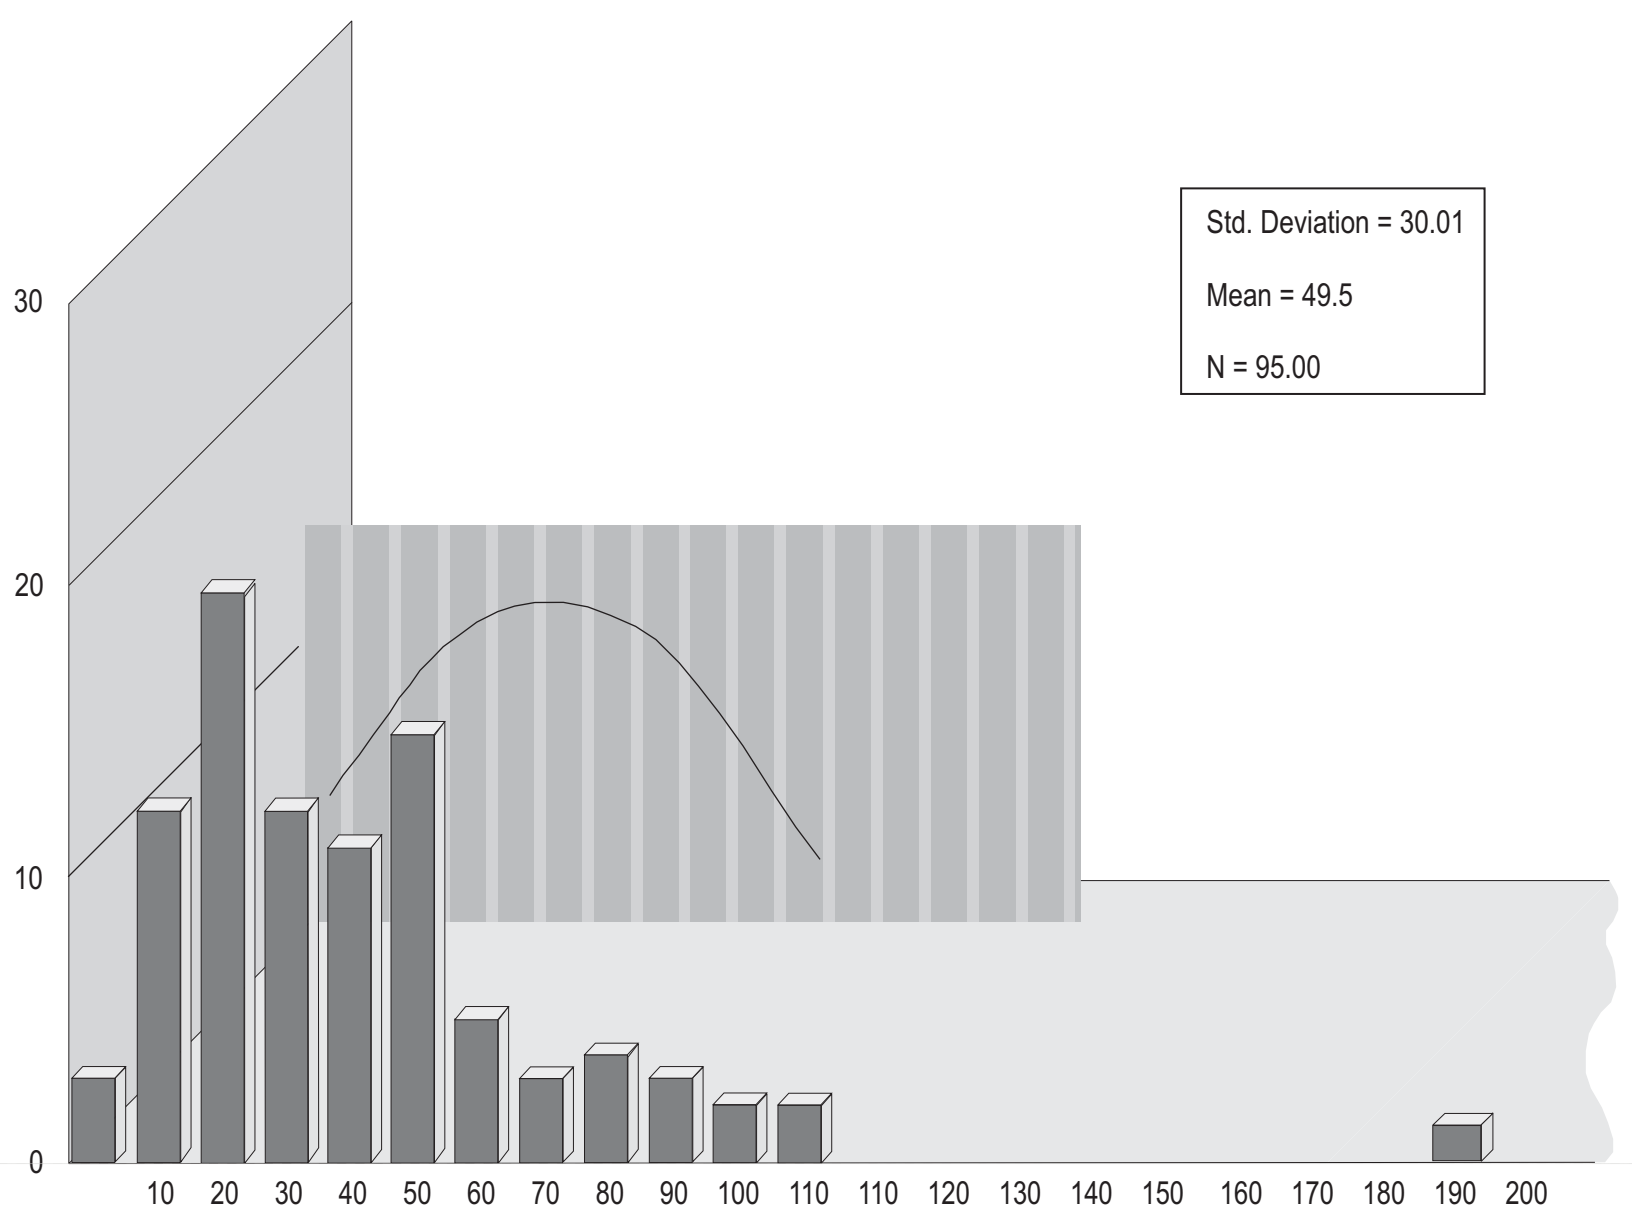

Supplement: MOESM3 [file 9516196]
